# Supplementary material for: A pyrazolate-stabilized sodium hydride complex
Source: Royal Society of Chemistry journal article supplement (doi:10.1039/c5cc00996k), 2015-01-01
Supplement: c5cc00996k1.pdf [file c5cc00996k1.pdf]

## Electronic supplementary information (ESI)

### A pyrazolate-stabilized sodium hydride complex

Andreas Stasch<sup>\*a</sup>

*<sup>a</sup>Dr. Andreas Stasch, School of Chemistry, Monash University, PO Box 23, Melbourne, VIC, 3800, Australia. E-mail: [Andreas.Stasch@monash.edu](mailto:Andreas.Stasch@monash.edu)*

| <b>Contents:</b>                                                                                                                               | <b>Page</b> |
|------------------------------------------------------------------------------------------------------------------------------------------------|-------------|
| 1. Experimental section                                                                                                                        | S2          |
| 1.1 General considerations                                                                                                                     | S2          |
| 1.2 [Na(pz)]                                                                                                                                   | S2          |
| 1.3 Synthesis of [(pz) <sub>6</sub> Na <sub>7</sub> H] <b>1</b>                                                                                | S3          |
| 1.4 [K(pz)]                                                                                                                                    | S4          |
| 2. X-ray crystallography                                                                                                                       | S4          |
| 2.1 General remarks                                                                                                                            | S4          |
| 2.2 Crystal structure of [(pz) <sub>6</sub> Na <sub>7</sub> H]·0.5 C <sub>6</sub> H <sub>6</sub> , <b>1</b> ·0.5 C <sub>6</sub> H <sub>6</sub> | S5          |
| 2.3 Crystal structure of [Na(pz)]·0.167 C <sub>7</sub> H <sub>8</sub>                                                                          | S6          |
| 2.4 Crystallographic details                                                                                                                   | S7          |
| 3. References                                                                                                                                  | S8          |

## 1. Experimental section

### 1.1 General considerations

All manipulations were carried out using standard Schlenk and glove box techniques under an atmosphere of high purity dinitrogen. Benzene, toluene, tetrahydrofuran and hexane were dried and distilled over molten potassium.  $^1\text{H}$  and  $^{13}\text{C}\{^1\text{H}\}$  NMR spectra were recorded on a Bruker DPX 300 or Bruker Avance 400 spectrometer in deuterated benzene and were referenced to the residual  $^1\text{H}$  or  $^{13}\text{C}\{^1\text{H}\}$  resonances of the solvent used. The IR spectrum was recorded using an Agilent Cary 630 ATR FTIR spectrometer. The melting point was determined in a sealed glass capillary under dinitrogen and is uncorrected. The elemental analysis was performed by the Elemental Analysis Service at London Metropolitan University. 3,5-Di-tert-butyl-1H-pyrazole (pzH)<sup>S1</sup> was prepared according to a literature procedure. Solid  $[\text{Na}^n\text{Bu}]$  and  $[\text{K}^n\text{Bu}]$  were prepared from the reaction of  $^n\text{BuLi}$  with  $[\text{MO}^t\text{Bu}]$  ( $\text{M} = \text{Na}, \text{K}$ ) as described elsewhere,<sup>S2</sup> and stored in a glove box freezer at  $-30^\circ\text{C}$ .  $\text{Ph}_2\text{SiH}_2$  (Sigma-Aldrich) was used as received. NMR experiments were carried out in 5 mm NMR tubes with J.Young stopcock in dried deuterated benzene (*ca.* 0.55 mL).

**1.2  $[\text{Na}(\text{pz})]$ .** The compound was reported previously and was prepared from the reaction of pzH with Na metal at elevated temperatures.<sup>S3,S4</sup>

**Preparation of  $[\text{Na}(\text{pz})]$  from  $[\text{Na}\{\text{N}(\text{SiMe}_3)_2\}]$  and pzH:** Toluene (15 cm<sup>3</sup>) was added to a solid mixture of  $[\text{Na}\{\text{N}(\text{SiMe}_3)_2\}]$  (0.60 g, 3.27 mmol, 1.05 eq) and pzH (0.56 g, 3.11 mmol, 1.0 eq) and stirred at room temperature for two hours giving a clear solution. All volatiles were removed and the residue was dried under vacuum at elevated temperature (*ca.* 50-60°C). *n*-Hexane (15 mL) was added and the mixture was vigorously stirred for one hour and then left to settle. The precipitate of  $[\text{Na}(\text{pz})]$  was filtered off and dried under vacuum. The *n*-hexane solution was concentrated under reduced pressure to approximately one third in volume and further crystalline material was obtained. Further concentration and cooling to 4°C afforded a small third crop. All crops were dried under vacuum. Yield: (0.39 g, 1.93 mmol, 62%).

**Reaction of pzH with NaH:**  $[\text{Na}(\text{pz})]$  was cleanly obtained by heating a sample of pzH with an excess of solid NaH in a sealed NMR tube in deuterated benzene to 60°C. Essentially complete conversion for a small sample was achieved after one day. Further heating for three additional days did not yield a different compound such as  $[(\text{pz})_6\text{Na}_7\text{H}]$  **1** and no NaH resonance (*e.g.* 5.17 ppm) was found.  $\text{H}_2$  was detected as the expected by-product.

**Reaction of pzH with [Na<sup>n</sup>Bu]:** Alternatively, [Na(pz)] can also be obtained from pzH and solid [Na<sup>n</sup>Bu] in toluene or benzene, for example, when further conversion of excess [Na<sup>n</sup>Bu] to **1** is carried out as the next step.

NMR data from the pzH and NaH experiments:

[Na(pz)] in deuterated benzene:  $\delta_{\text{H}}$ (300.13 MHz; C<sub>6</sub>D<sub>6</sub>; 298K; Me<sub>4</sub>Si): 1.16 (s, 18H, C(CH<sub>3</sub>)<sub>3</sub>), 6.10 (s, 1H, CH).

For comparison: pzH in deuterated benzene  $\delta_{\text{H}}$ (300.13 MHz; C<sub>6</sub>D<sub>6</sub>; 298K; Me<sub>4</sub>Si): 1.32 (s, 18H, C(CH<sub>3</sub>)<sub>3</sub>), 6.00 (s, 1H, CH), 11.70 (s, 1H, NH)

X-ray structural study: during the study a different solvate from toluene, [Na(pz)]·0.167 C<sub>7</sub>H<sub>8</sub>, was characterised, see the X-ray crystallography section.

**1.3 Synthesis of [(pz)<sub>6</sub>Na<sub>7</sub>H] **1**.** Toluene (12 cm<sup>3</sup>) was added to a solid mixture of [Na(pz)] (0.18 g, 0.890 mmol, 1.4 eq) and [Na<sup>n</sup>Bu] (50 mg, 0.624 mmol, 1.0 eq) and stirred at room temperature. Ph<sub>2</sub>SiH<sub>2</sub> (0.14 mL, 0.139 g, 0.754 mmol, 1.2 eq) was added, the mixture almost fully dissolved and was stirred for two hours at 90°C to yield a colourless solution. After cooling to room temperature, all volatiles were removed (via a gel-like solid) and the residue was dried under vacuum. *n*-Hexane (12 mL) was added and the mixture was vigorously stirred at 50°C for one hour and cooled to room temperature. The precipitate was filtered off and dried under vacuum to yield [(pz)<sub>6</sub>Na<sub>7</sub>H] **1** (0.12 g). Note: concentration and cooling of the silane-rich *n*-hexane solution afforded a very small crop of [(pz)<sub>6</sub>Na<sub>7</sub>H] **1** after drying under vacuum. The compound can be recrystallised from benzene and the crystal structure of [(pz)<sub>6</sub>Na<sub>7</sub>H]·0.5 C<sub>6</sub>H<sub>6</sub>, **1**·0.5 C<sub>6</sub>H<sub>6</sub>, was determined, see the X-ray crystallography section. Yield: 0.12 g (0.0970 mmol, 65%) of solvent-free [(pz)<sub>6</sub>Na<sub>7</sub>H] **1**. M.p.: slowly changes towards off-white above 300°C, no visible full decomposition or melting up to 350°C. Elemental analysis (on [(pz)<sub>6</sub>Na<sub>7</sub>H] **1**): found: C, 64.2; H, 9.5; N, 13.4. Calc. for C<sub>66</sub>H<sub>115</sub>N<sub>12</sub>Na<sub>7</sub> (1237.63 g/mol): C, 64.05; H, 9.4; N, 13.6%. <sup>1</sup>H and <sup>13</sup>C{<sup>1</sup>H} solution NMR data for [(pz)<sub>6</sub>Na<sub>7</sub>H] in deuterated benzene:  $\delta_{\text{H}}$  (300.13 MHz; C<sub>6</sub>D<sub>6</sub>; 298K; Me<sub>4</sub>Si): 1.14 (s, 108H, C(CH<sub>3</sub>)<sub>3</sub>), 5.17 (s, br, 1H, NaH), 6.09 (s, 6H, CH).  $\delta_{\text{C}}$  (75.5 MHz; C<sub>6</sub>D<sub>6</sub>; 298K; Me<sub>4</sub>Si): 31.7 (C(CH<sub>3</sub>)<sub>3</sub>), 32.1 (C(CH<sub>3</sub>)<sub>3</sub>), 97.1 (pz-CH), 165.7 (pz-NC). IR (ATR, solid):  $\nu_{\text{max}}$ /cm<sup>-1</sup> 3025w, 2960s, 2930m, 2905m, 2861m, 1567m, 1489s, 1459s, 1359m, 1284m, 1247s, 1205m, 1196m, 1128w, 1015m, 1003s, 991s, 957m, 901w, 864s, 801s, 777m, 728s, 705m, 700m, 682m, 674m, 666m, 657m.

Note: Room temperature preparations using [Na(pz)], [Na<sup>n</sup>Bu] and Ph<sub>2</sub>SiH<sub>2</sub> in hydrocarbon solvents did afford some crystals of [(pz)<sub>6</sub>Na<sub>7</sub>H] **1**, but the reaction mixtures were very difficult to work-up and purify, and filtrations were near impossible, with some gel-like precipitate present. Changing the reactions conditions to hot toluene afforded a more straightforward synthesis. *In-situ* NMR experiments in deuterated benzene did produce resonances for some symmetric compound plus

silane by-products, though a potential NaH resonance is hidden by very strong SiH peaks and thus these experiments were not suitable for studying the formation of [(pz)<sub>6</sub>Na<sub>7</sub>H] **1** in solution.

**1.4 [K(pz)].** The compound was reported previously and was prepared from the reaction of pzH with K metal at elevated temperatures.<sup>S3</sup> It can similarly to [Na(pz)] be prepared from pzH and [K{N(SiMe<sub>3</sub>)<sub>2</sub>}] in toluene to form a precipitate of [K(pz)] that can be washed with *n*-hexane and dried under vacuum, or by reacting pzH with a slight excess of KH in toluene. The latter reaction proceeds already at room temperature (*c.f.* the NaH reaction) due to the higher reactivity of KH vs. NaH, though is faster at elevated temperatures. The product [K(pz)] is virtually insoluble in toluene and can be extracted with THF and crystallises as a solvent-free polymer. In experiments using [K(pz)], [K<sup>n</sup>Bu] and Ph<sub>2</sub>SiH<sub>2</sub>, similar to the synthesis of **1**, we only obtained crystallised polymeric [K(pz)] from neat THF so far.

## 2. X-ray crystallography

### 2.1 General remarks

Suitable crystals were mounted in silicone oil and were measured at the MX1 beamline at the Australian Synchrotron using synchrotron radiation with a wavelength close to Mo<sub>Kα</sub> radiation. Data collection was performed using the Blu-Ice<sup>S5</sup> software package, and data reduction was performed using XDS.<sup>S6</sup> All structures were solved and refined by direct methods using SHELX.<sup>S7</sup> Semi-empirical (multi-scan) absorption corrections were performed on all datasets. All non-hydrogen atoms were refined anisotropically. Hydrogen atoms on organic groups were included in calculated positions using the riding model. The central hydride in [(pz)<sub>6</sub>Na<sub>7</sub>H]·0.5 C<sub>6</sub>H<sub>6</sub>, **1**·0.5 C<sub>6</sub>H<sub>6</sub>, was located from difference maps and its position was freely refined. Refinement details are summarized in 2.4, Table S1. CCDC 1043423 (**1**·0.5 C<sub>6</sub>H<sub>6</sub>) and 1043424 ([Na(pz)]·0.167 C<sub>7</sub>H<sub>8</sub>) contains the supplementary crystallographic data for this paper. These data can be obtained free of charge from The Cambridge Crystallographic Data Centre via [www.ccdc.cam.ac.uk/data\\_request/cif](http://www.ccdc.cam.ac.uk/data_request/cif).

## 2.2 Crystal structure of [(pz)<sub>6</sub>Na<sub>7</sub>H]·0.5 C<sub>6</sub>H<sub>6</sub>, 1·0.5 C<sub>6</sub>H<sub>6</sub>

Crystals of the benzene solvate of [(pz)<sub>6</sub>Na<sub>7</sub>H] **1** were obtained from a concentrated benzene solution at room temperature. The complex crystallises with a full molecule in the tetragonal crystal system (Fig. S1). Four tert-butyl groups are disordered and were modelled using two positions for the methyl groups and were refined using geometry restraints. This resulted in two positions each for C16-C18 (75 and 25% parts), C27-C29 (55 and 45% parts), C38-C40 (71 and 29% parts) and C64-C66 (77 and 23% parts), and their respective attached hydrogen atoms.

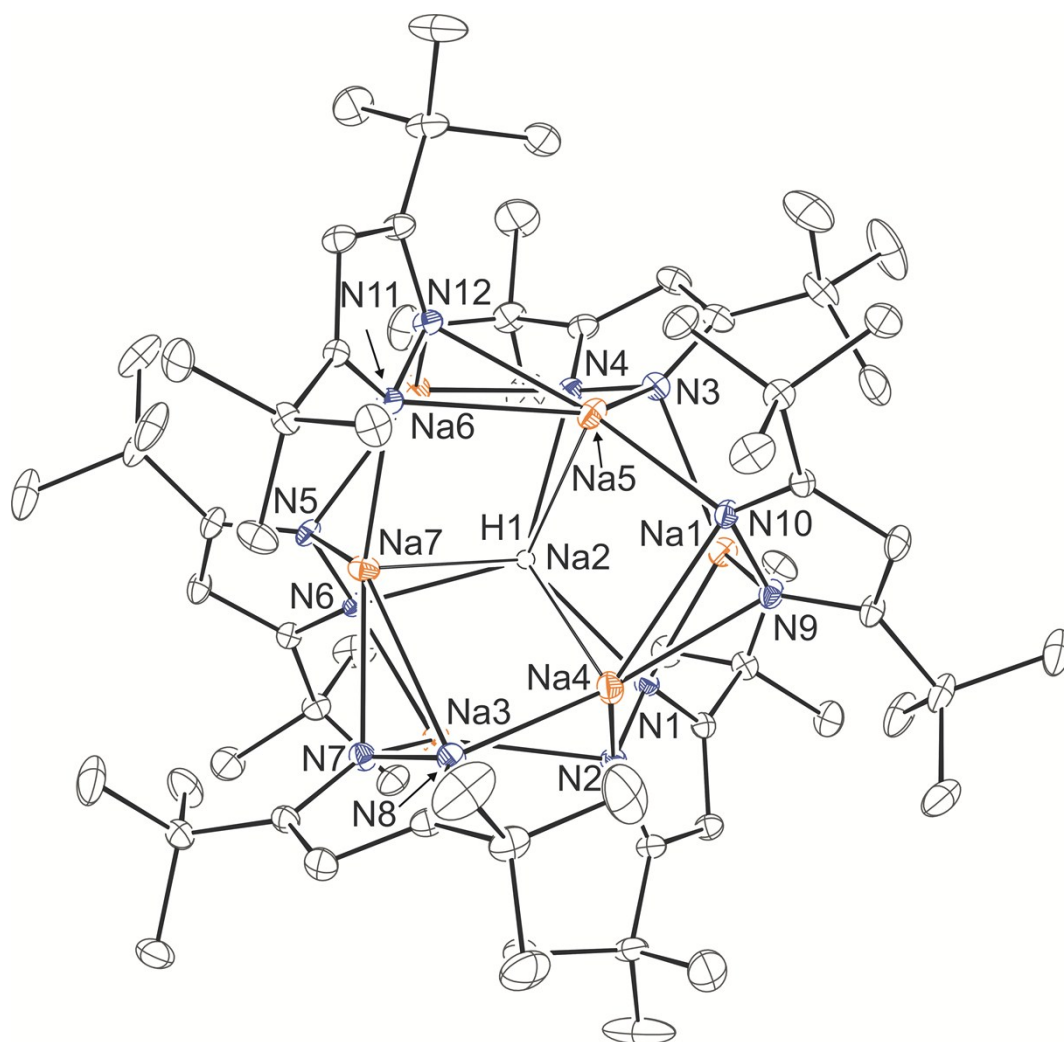

**Fig. S1** Molecular structure of [(pz)<sub>6</sub>Na<sub>7</sub>H] **1**·0.5 C<sub>6</sub>H<sub>6</sub> (ORTEP drawing, 30% thermal ellipsoids): view along the H1···Na2 contact. Solvent molecule, minor disordered parts and hydrogen atoms except H1 are omitted for clarity.

### 2.3 Crystal structure of $[\text{Na}(\text{pz})]\cdot 0.167 \text{C}_7\text{H}_8$

This compound could be crystallized as a toluene solvate in one-dimensional chains in a similar manner to previously characterised solvates or polymorphs.<sup>S3,S4</sup> The asymmetric unit (see Fig. S2) contains six independent (pz)Na-fragments and one full toluene molecule. One tert-butyl group is disordered and was modelled using two positions for the methyl groups and was refined using geometry restraints. This resulted in two positions each for C16-C18 (72 and 28% parts) and their respective attached hydrogen atoms.

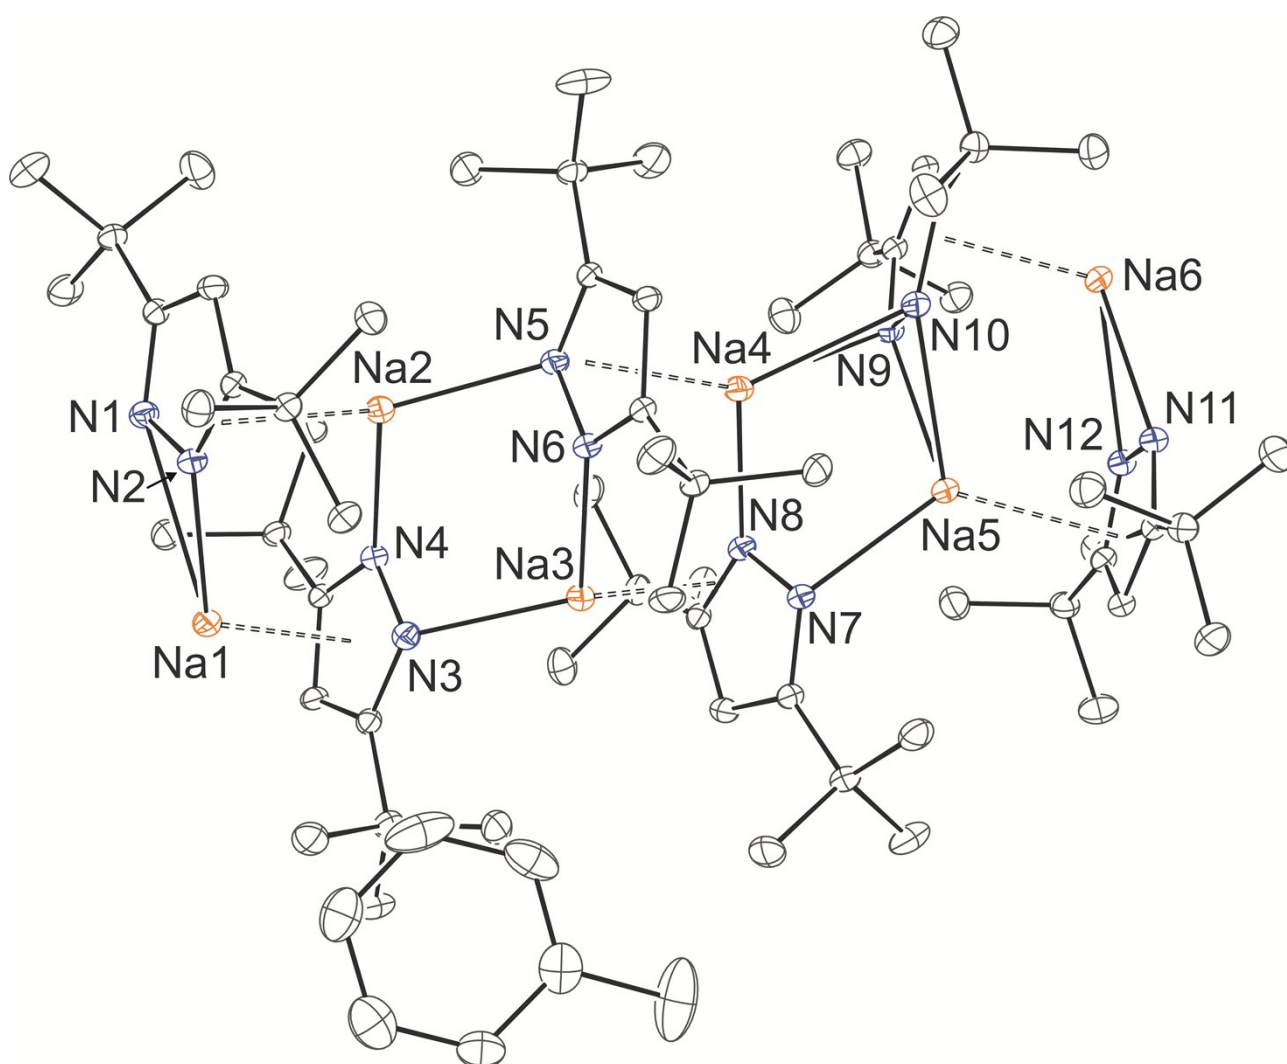

**Fig. S2** Asymmetric unit of the molecular structure of  $[\text{Na}(\text{pz})]\cdot 0.167 \text{C}_7\text{H}_8$  (30% thermal ellipsoids) containing six (pz)Na fragments (that grow into a one-dimensional polymer) and one toluene molecule. A minor disordered part and hydrogen atoms are omitted for clarity.

## 2.4 Crystallographic details

**Table S1** Crystallographic data.

| Compound reference                                                            | [(pz) <sub>6</sub> Na <sub>7</sub> H]·0.5 C <sub>6</sub> H <sub>6</sub> , 1·0.5 C <sub>6</sub> H <sub>6</sub> | [Na(pz)]·0.167 C <sub>7</sub> H <sub>8</sub>            |
|-------------------------------------------------------------------------------|---------------------------------------------------------------------------------------------------------------|---------------------------------------------------------|
| Chemical formula                                                              | C <sub>69</sub> H <sub>118</sub> N <sub>12</sub> Na <sub>7</sub>                                              | C <sub>12.17</sub> H <sub>20.33</sub> N <sub>2</sub> Na |
| Formula Mass                                                                  | 1276.68                                                                                                       | 217.63                                                  |
| Crystal system                                                                | Tetragonal                                                                                                    | Monoclinic                                              |
| <i>a</i> /Å                                                                   | 32.759(5)                                                                                                     | 15.184(3)                                               |
| <i>b</i> /Å                                                                   | 32.759(5)                                                                                                     | 19.831(4)                                               |
| <i>c</i> /Å                                                                   | 29.376(6)                                                                                                     | 26.107(5)                                               |
| <i>α</i> /°                                                                   | 90                                                                                                            | 90.00                                                   |
| <i>β</i> /°                                                                   | 90                                                                                                            | 100.11(3)                                               |
| <i>γ</i> /°                                                                   | 90                                                                                                            | 90.00                                                   |
| Unit cell volume/Å <sup>3</sup>                                               | 31525(11)                                                                                                     | 7739(3)                                                 |
| Temperature/K                                                                 | 100(2)                                                                                                        | 100(2)                                                  |
| Space group                                                                   | <i>I</i> -42 <i>d</i>                                                                                         | <i>P</i> 2 <sub>1</sub> / <i>c</i>                      |
| <i>Z</i>                                                                      | 16                                                                                                            | 24                                                      |
| Radiation type, λ/Å                                                           | Synchrotron, 0.71080                                                                                          | Synchrotron, 0.71080                                    |
| Crystal size/mm                                                               | 0.12 × 0.10 × 0.07                                                                                            | 0.10 × 0.04 × 0.03                                      |
| Absorption coefficient, μ/mm <sup>-1</sup>                                    | 0.097                                                                                                         | 0.095                                                   |
| Theta range/°                                                                 | 0.931-27.998                                                                                                  | 1.297-31.206                                            |
| Data completeness                                                             | 99.7% (at theta max)                                                                                          | 99.6% (at 25.00° theta)                                 |
| No. of reflections measured                                                   | 178030                                                                                                        | 75996                                                   |
| No. of independent reflections                                                | 18969                                                                                                         | 22016                                                   |
| <i>R</i> <sub>int</sub>                                                       | 0.1649                                                                                                        | 0.1059                                                  |
| Final <i>R</i> <sub>1</sub> values ( <i>I</i> > 2σ( <i>I</i> ))               | 0.0539                                                                                                        | 0.0675                                                  |
| Final <i>wR</i> ( <i>F</i> <sup>2</sup> ) values ( <i>I</i> > 2σ( <i>I</i> )) | 0.1389                                                                                                        | 0.1635                                                  |
| Final <i>R</i> <sub>1</sub> values (all data)                                 | 0.0547                                                                                                        | 0.1179                                                  |
| Final <i>wR</i> ( <i>F</i> <sup>2</sup> ) values (all data)                   | 0.1398                                                                                                        | 0.1923                                                  |
| Goodness of fit on <i>F</i> <sup>2</sup>                                      | 1.065                                                                                                         | 1.019                                                   |
| Largest diff. peak and hole/e·Å <sup>-3</sup>                                 | 0.414 and -0.505                                                                                              | 0.719 and -0.405                                        |
| CCDC number                                                                   | 1043423                                                                                                       | 1043424                                                 |

### 3. References

- S1 C. Fernandez-Castano, C. Foces-Foces, N. Jagerovic and J. Elguero, *J. Mol. Struct.*, 1995, **355**, 265–271; J. Elguero, E. Gonzalez and R. Jacquier, *Bull. Soc. Chim. Fr.*, 1968, 707–713.
- S2 L. Lochmann, J. Pospisil and D. Lim, *Tetrahedron Let.*, 1966, **7**, 257–262; C. Schade, W. Bauer and P. v. R. Schleyer, *J. Organomet. Chem.*, 1985, **295**, C25–C28; R. Pi, W. Bauer, B. Brix, C. Schade and P. v. R. Schleyer, *J. Organomet. Chem.*, 1986, **306**, C1–C4.
- S3 S.-A. Cortes-Llamas, R. Hernandez-Lamonedas, M.-A. Velazquez-Carmona, M.-A. Munoz-Hernandez and R.A. Toscano, *Inorg. Chem.*, 2006, **45**, 286–294.
- S4 S. Beaini, G.B. Deacon, A.P. Erven, P.C. Junk and D.R. Turner, *Chem. Asian J.*, 2007, **2**, 539–550.
- S5 T.M. McPhillips, S.E. McPhillips, H.J. Chiu, A.E. Cohen, A.M. Deacon, P.J. Ellis, E. Garman, A. Gonzalez, N.K. Sauter, R.P. Phizackerley, S.M. Soltis and P. Kuhn, *J. Synchrotron Radiat.*, 2002, **9**, 401–406.
- S6 W. Kabsch, *J. Appl. Crystallogr.*, 1993, **26**, 795–800.
- S7 G.M. Sheldrick, *Acta Cryst.*, 2008, **A64**, 112–122.
